RESEARCH ARTICLE

# Simultaneous Imaging of CBF Change and BOLD with Saturation-Recovery-T<sub>1</sub> Method

Xiao Wang, Xiao-Hong Zhu, Yi Zhang, Wei Chen\*

Center for Magnetic Resonance Research, Department of Radiology, University of Minnesota Medical School, Minneapolis, Minnesota, United States of America

\* [wei@cmrr.umn.edu](mailto:wei@cmrr.umn.edu)

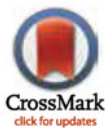

OPEN ACCESS

**Citation:** Wang X, Zhu X-H, Zhang Y, Chen W (2015) Simultaneous Imaging of CBF Change and BOLD with Saturation-Recovery-T<sub>1</sub> Method. PLoS ONE 10(4): e0122563. doi:10.1371/journal.pone.0122563

**Academic Editor:** Hengyi Rao, University of Pennsylvania, UNITED STATES

**Received:** September 26, 2014

**Accepted:** February 23, 2015

**Published:** April 23, 2015

**Copyright:** © 2015 Wang et al. This is an open access article distributed under the terms of the [Creative Commons Attribution License](https://creativecommons.org/licenses/by/4.0/), which permits unrestricted use, distribution, and reproduction in any medium, provided the original author and source are credited.

**Data Availability Statement:** All relevant data are uploaded to Figshare, as follows: R1\_isch.mat DOI 10.6084/m9.figshare.1320912; R1\_hyper.mat DOI 10.6084/m9.figshare.1320909; BOLD\_isch.mat DOI 10.6084/m9.figshare.1320910; BOLD\_hyper.mat DOI 10.6084/m9.figshare.1320911; SR\_R1 PLOS ONE upload.xlsx DOI 10.6084/m9.figshare.1327749.

**Funding:** This work was partially supported by NIH grants NS057560, NS041262, NS070839, P41 RR08079 & EB015894, P30 NS057091 & NS076408 and WM Keck Foundation.

**Competing Interests:** The authors have declared that no competing interests exist.

## Abstract

A neuroimaging technique based on the saturation-recovery (SR)-T<sub>1</sub> MRI method was applied for simultaneously imaging blood oxygenation level dependence (BOLD) contrast and cerebral blood flow change ( $\Delta$ CBF), which is determined by CBF-sensitive T<sub>1</sub> relaxation rate change ( $\Delta R_1^{CBF}$ ). This technique was validated by quantitatively examining the relationships among  $\Delta R_1^{CBF}$ ,  $\Delta$ CBF, BOLD and relative CBF change (rCBF), which was simultaneously measured by laser Doppler flowmetry under global ischemia and hypercapnia conditions, respectively, in the rat brain. It was found that during ischemia, BOLD decreased  $23.1 \pm 2.8\%$  in the cortical area;  $\Delta R_1^{CBF}$  decreased  $0.020 \pm 0.004 s^{-1}$  corresponding to a  $\Delta$ CBF decrease of  $1.07 \pm 0.24$  ml/g/min and  $89.5 \pm 1.8\%$  CBF reduction ( $n=5$ ), resulting in a baseline CBF value ( $=1.18$  ml/g/min) consistent with the literature reports. The CBF change quantification based on temperature corrected  $\Delta R_1^{CBF}$  had a better accuracy than apparent R<sub>1</sub> change ( $\Delta R_1^{app}$ ); nevertheless,  $\Delta R_1^{app}$  without temperature correction still provides a good approximation for quantifying CBF change since perfusion dominates the evolution of the longitudinal relaxation rate (R<sub>1</sub><sup>app</sup>). In contrast to the excellent consistency between  $\Delta$ CBF and rCBF measured during and after ischemia, the BOLD change during the post-ischemia period was temporally disassociated with  $\Delta$ CBF, indicating distinct CBF and BOLD responses. Similar results were also observed for the hypercapnia study. The overall results demonstrate that the SR-T<sub>1</sub> MRI method is effective for noninvasive and quantitative imaging of both  $\Delta$ CBF and BOLD associated with physiological and/or pathological changes.

## Introduction

Cerebral blood perfusion through the capillary bed is essential for brain function. Imaging of cerebral blood flow (CBF) provides valuable information regarding brain physiology, function, activation and tissue viability associated with a large number of brain diseases. Arterial spin labeling (ASL), a noninvasive MRI technique which utilizes the radiofrequency (RF) pulse to label the flowing arterial water spin as an endogenous and diffusible tracer for imaging CBF [1–7], plays an ever-growing role in scientific and clinical research. An inversion-recovery preparation is commonly applied for most ASL methods, and paired images (one control and

another with spin tagging) are acquired with an appropriate inversion recovery time. The signal difference between the paired images can be used to determine the CBF value and it is particularly useful for imaging relative CBF changes, for instance, induced during brain activation [8, 9] and/or physiology/pathology perturbations.

An alternative MRI-based CBF imaging method is to measure the parametric parameter of apparent longitudinal relaxation time ( $T_1^{\text{app}}$ ) directly by using inversion-recovery preparation with varied inversion-recovery time ( $T_{\text{IR}}$ ) [2, 6, 10]. Due to the slow  $T_1^{\text{app}}$  relaxation processing, this method requires a relatively long repetition time (TR) to acquire a serial of images with different  $T_{\text{IR}}$  values in order to generate  $T_1^{\text{app}}$  images, thus, results in low temporal resolution for imaging CBF. Nevertheless, this method should be robust in quantifying CBF and its change in the absolute scale with the unit of ml blood/g brain tissue/min (or ml/g/min) owing to a simple relationship between  $T_1^{\text{app}}$  and CBF (see more details in [Method and Theory](#)).

One common, interesting observation related to  $T_1^{\text{app}}$  changes reported in the literature is the detection of  $T_1^{\text{app}}$  increase at an early stage of ischemia, indicating a possible link between the brain tissue  $T_1^{\text{app}}$  change and the perfusion deficit caused by the ischemia [11–14]. However, the quantitative relationship between the observed  $T_1^{\text{app}}$  change and the CBF reduction extent caused by acute ischemia has not been rigorously, quantitatively studied. A potential difficulty for quantifying CBF via the measurement of  $T_1^{\text{app}}$  lies on the confounding effect from the brain tissue temperature change owing to physiological and/or pathological perturbation, which can also contribute to the  $T_1^{\text{app}}$  change [15–18]. Consideration and correction of this confound effect might improve the accuracy of quantifying CBF based on the  $T_1^{\text{app}}$  measurement. Another layer of complexity is the phenomena of concurrent changes in both perfusion and the blood oxygenation level dependence (BOLD) contrast [19, 20] during either physiology perturbation (e.g., brain stimulation) or pathology perturbation (e.g., hypoxia via ischemia); and these changes could affect the MRI intensity via either  $T_1^{\text{app}}$  based mechanism owing to perfusion change or the transverse (or apparent transverse) relaxation time ( $T_2/T_2^*$ ) based mechanism owing to BOLD contrast.

To address these issues, we conducted a study aiming to: i) develop a robust neuroimaging approach to simultaneously measure and image the CBF change and the BOLD contrast by using the saturation-recovery (SR)- $T_1$  MRI method; ii) validate this approach by conducting simultaneous *in vivo* measurements of CBF change using the SR- $T_1$  MRI method and the relative CBF change using laser Doppler flowmetry (LDF) recording under transient hypercapnia (increasing CBF) and acute ischemia (reducing CBF) conditions using a rat model at 9.4T; iii) investigate the effect of brain temperature change on  $T_1^{\text{app}}$  and the apparent longitudinal relaxation rate ( $R_1^{\text{app}} = 1/T_1^{\text{app}}$ ) after the induction of hypercapnia or ischemia (see [S1 Supporting Information](#)); iv) establish the quantitative relationship between the CBF-sensitive  $R_1$  change ( $\Delta R_1^{\text{CBF}}$ ) and the CBF change ( $\Delta \text{CBF}$ ); and v) quantitatively study the temporal relationships among  $R_1^{\text{CBF}}$  change,  $\Delta \text{CBF}$ , relative CBF change and BOLD during and after hypercapnia or ischemia.

## Method and Theory

### The SR- $T_1$ MRI pulse sequence for imaging $T_1^{\text{app}}$

The MRI perfusion method described herein relies on quantitative  $T_1^{\text{app}}$  mapping using the magnetization saturation-recovery preparation without slice selection and fast gradient-echo echo-planar imaging (GE-EPI) sampling [21]. The regional saturation-recovery preparation is confined by using a RF surface coil with a focal, intense RF field ( $B_1$ ) covering the rat brain [22]. [Fig 1](#) is the schematic diagram showing the imaging pulse sequence and principle underlying the SR- $T_1$  MRI method. The magnetization saturation preparation is achieved by an

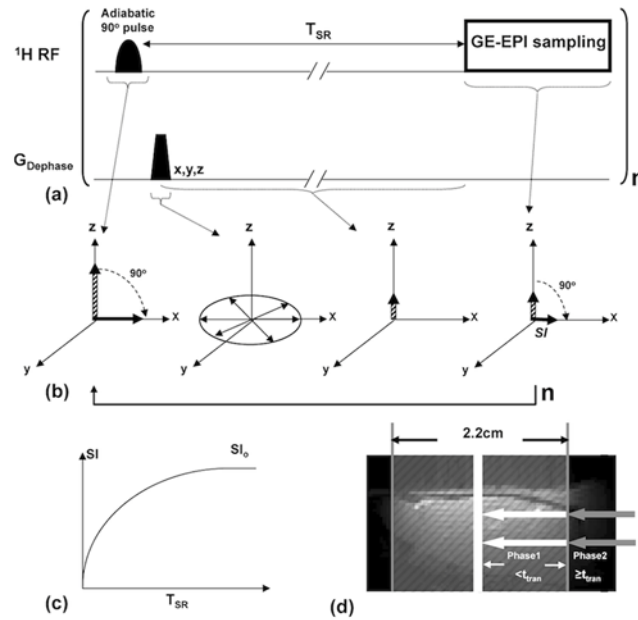

**Fig 1. Schematic diagram of the SR- $T_1$  MRI sequence and spin magnetization evolution in rotating frame.** (a) Gradient-echo EPI (GE-EPI) sampling is applied after the saturation-recovery waiting time ( $T_{\text{SR}}$ ). There is no an extra delay time between the imaging acquisition and the next saturation pulse. This imaging measurement is repeated  $n$  times with varied  $T_{\text{SR}}$ . (b) Schematic diagram illustrating the principle underlying the imaging sequence in the spin-rotating frame. It shows the rotation of longitudinal magnetization ( $M_z$ ), dephasing of transverse magnetization ( $M_{xy}$ ) and its evolution after  $T_{\text{SR}}$  and spin excitation pulse followed by GE-EPI acquisition. (c) Exponential recovery curve of GE-EPI signal intensity (SI) as a function of  $T_{\text{SR}}$ . The regression of this curve determines the apparent  $T_1$  ( $T_1^{\text{app}}$ ) value that is sensitive to perfusion. (d) Schematic diagram of two-phase model incorporated with the SR- $T_1$  method developed in this study. The regional saturation zone (gray shaded area) achieved by a surface RF coil overlapped on a rat brain sagittal anatomic image. The white arrows stand for the Phase 1 arterial spins in the saturated region traveling into the image slice within the time window  $t_{\text{tran}}$  (i.e., when  $T_{\text{SR}} < t_{\text{tran}}$ ). The gray arrows indicate the unsaturated Phase 2 arterial blood spins flowing into the image slice when the traveling time is longer than  $t_{\text{tran}}$  or equal to (i.e., when  $T_{\text{SR}} \geq t_{\text{tran}}$ ).

doi:10.1371/journal.pone.0122563.g001

adiabatic half passage  $90^\circ$  RF pulse, which is insensitive to the inhomogeneous  $B_1$  field of a surface coil, immediately followed by dephasing gradients ( $G_{\text{DePhase}}$ ) in three dimensions (Fig 1a). The adiabatic  $90^\circ$  pulse rotates the longitudinal magnetization ( $M_z$ ) into the transverse plane in a spin-rotating frame, resulting in the transverse magnetization ( $M_{xy}$ ) with the same magnitude of  $M_z$ . The  $M_{xy}$  rapidly loses its phase coherence because of the strong dephasing effect by  $G_{\text{DePhase}}$ . The overall effect of the magnetization saturation preparation in combination with the dephasing gradients is to approach zero magnetizations for both  $M_z$  and  $M_{xy}$  components (Fig 1b). This magnetization preparation is independent of the initial  $M_z$  value or its reduction from the previous scan owing to the partial magnetization saturation effect when a relatively short TR is applied. Therefore, no extra delay before the adiabatic  $90^\circ$  pulse is needed. This feature can significantly shorten the total image acquisition time and improve the temporal resolution for imaging  $T_1^{\text{app}}$  as compared to the conventional inversion-recovery preparation in which the net magnitude of inverted  $M_z$  depends on the initial  $M_z$  prior to the inversion pulse and the effect of partial saturation as a function of TR, thus, a relatively long TR is preferred for each  $T_{\text{IR}}$  measurement. During the period of saturation-recovery time ( $T_{\text{SR}}$ ), the longitudinal magnetization starts to relax and recover approximately according to an exponential function (Fig 1c). This recovered  $M_z$  after a period of  $T_{\text{SR}}$  is rotated to the transverse plane again by a spin excitation RF pulse with a nominal  $90^\circ$  flip angle, and then sampled by EPI acquisition.

The detected EPI signal intensity (SI) without considering the perfusion effect on  $T_1^{app}$  obeys the following equation:

$$SI = SI_0 \cdot [1 - e^{-\frac{T_{SR}}{T_1^{app}}}] \cdot e^{-\frac{TE}{T_2^*}} \tag{1}$$

where TE is the spin echo time; and  $T_2^*$  is the apparent transverse relaxation time, which is sensitive to magnetic field inhomogeneity and susceptibility effect, such as the BOLD contrast;  $SI_0$  is the EPI signal intensity when TE = 0 and  $T_{SR} = \infty$ . This equation can be used for  $T_1^{app}$  regression based on a number of SI measurements with varied  $T_{SR}$ . When  $T_{SR}$  is sufficiently long (e.g.,  $\geq 5T_1^{app}$  as applied in this study) and TE > 0, the second term in (Eq 1) approaches one, and (Eq 1) becomes:

$$SI^* = SI_0 \cdot e^{-\frac{TE}{T_2^*}} \tag{2}$$

Under this condition,  $SI^*$  is determined by the  $T_2^*$  relaxation process and becomes independent of  $T_1^{app}$ ; thus, this signal can be used to quantify the “true” BOLD contrast without confounding effect from the saturation effect caused by the perfusion contribution [19, 20, 23]. Moreover, the addition of  $SI^*$  measurement with a long  $T_{SR}$ , thus, a long TR is also critical to improve the reliability and accuracy for  $T_1^{app}$  regression, which is essential in determining the absolute CBF change, though it leads to a relatively low temporal resolution for simultaneously obtaining  $T_1^{app}$  and BOLD images.

In this study, two brain conditions are defined by the subscript “RC” standing for the Reference Condition (i.e., control) before the induction of physiological/pathological perturbation, and the subscript “PC” standing for the Perturbed Condition by the induction of either hypercapnia (hyper-perfusion) or ischemia (hypo-perfusion). Accordingly, the BOLD contrast can be quantified by:

$$BOLD = \frac{SI_{PC}^* - SI_{RC}^*}{SI_{RC}^*} \quad \text{or} \quad rBOLD = \frac{SI_{PC}^*}{SI_{RC}^*} \tag{3}$$

where rBOLD stands for the relative BOLD.

### Two-phase arterial spin modeling of the SR- $T_1$ MRI method

The Block equation describes the dynamic behavior of brain water magnetization as the following:

$$\frac{dM_b(t)}{dt} = \frac{M_b^0 - M_b(t)}{T_1} + f[M_a(t) - M_v(t)] \tag{4}$$

where  $M_a$ ,  $M_b$  and  $M_v$  are the longitudinal water magnetization of the arterial blood, brain tissue and venous blood respectively;  $M_b^0$  is the equilibrium value of  $M_b$ ;  $T_1$  is the brain tissue water longitudinal relaxation time in the absence of blood flow;  $f$  represents the CBF value. Associated with the proposed experimental MR preparation and acquisition, we solve (Eq 4) with a two-phase arterial spin model as illustrated in Fig 1d, showing the schematic graph of the global brain region (shaded gray area) saturated by the RF coil overlapped on a rat brain sagittal anatomic image. Phase 1 represents the time window in which the image slice receives the flowing saturated arterial spins within the regional saturation region (as indicated with the white arrows in the Fig 1d); and Phase 2 characterizes the time window when the fresh, fully relaxed arterial spins sitting outside of the saturation region (as indicated with the gray arrows in Fig 1d) flowing into the image slice. Assuming the arterial blood spins travel smoothly as bulk flow at a constant speed without any turbulence, the fresh spins at the edge of the saturation

region will take the artery transit time ( $t_{\text{tran}}$ ) to reach the image slice. For the SR- $T_1$  measurement with the boundary condition of  $M_b(t = 0) = 0$ , the final solution (see [S1 Supporting Information](#) for details) for (Eq 4) and Phase 1 when  $t < t_{\text{tran}}$  follows:

$$M_b(0 - t_{\text{tran}}) = M_b^0 \left[ \left( 1 - e^{-\frac{t}{T_1^{\text{app}}}} \right) - \frac{f}{\lambda \cdot \left( \frac{1}{T_1^{\text{app}}} - \frac{1}{T_{1a}} \right)} \left( e^{-\frac{t}{T_{1a}}} - e^{-\frac{t}{T_1^{\text{app}}}} \right) \right] = M_b^0(A - B)$$

$$A = 1 - e^{-\frac{t}{T_1^{\text{app}}}}$$

$$B = \frac{f}{\lambda \cdot \left( \frac{1}{T_1^{\text{app}}} - \frac{1}{T_{1a}} \right)} \left( e^{-\frac{t}{T_{1a}}} - e^{-\frac{t}{T_1^{\text{app}}}} \right)$$
(5)

where  $T_{1a}$  is the longitudinal relaxation time of arterial blood and

$$\frac{1}{T_1^{\text{app}}} = \frac{1}{T_1} + \frac{1}{T_1^{\text{temp}}} + \frac{f}{\lambda} \quad \text{or} \quad R_1^{\text{app}} = R_1 + R_1^{\text{temp}} + \frac{f}{\lambda}$$
(6)

where  $\lambda$  ( $= 0.9$  ml/g) is the brain-blood partition coefficient,  $T_1^{\text{temp}}$  ( $R_1^{\text{temp}}$ ) is the contribution of temperature-dependent longitudinal relaxation time (rate) caused by brain temperature alteration during physiological or pathological perturbation (see [S1 Supporting Information](#)).

During Phase 2 the fully relaxed artery spins in the blood outside the saturation region flow into the rat brain, and will approach the image plane and exchange with the brain tissue water spins when  $t \geq t_{\text{tran}}$ . Final solution for Phase 2 of (Eq 4) when  $t \geq t_{\text{tran}}$  with the initial condition using (Eq 5) with the boundary condition of  $t = t_{\text{tran}}$  gives:

$$M_b(t \geq t_{\text{tran}}) = M_b^0 \left[ 1 - e^{-\frac{t}{T_1^{\text{app}}}} \cdot (1 - C_A + C_B) \right]$$
(7)

where  $C_A$  and  $C_B$  are the constants which equal to  $A$  and  $B$  in (Eq 5), respectively, when  $t = t_{\text{tran}}$ , they reflect the boundary condition and ensure the function continuity between Phase 1 and Phase 2. Therefore, when the saturation recovery time is shorter than  $t_{\text{tran}}$  (Phase 1), the magnetization of brain tissue water relaxes following (Eq 5) whereas when the saturation recovery time is longer than or equal to  $t_{\text{tran}}$  it will relax according to (Eq 7) instead. It is clear that the brain magnetization recovery with a long saturation recovery time of  $T_{\text{SR}} \geq t_{\text{tran}}$  (Phase 2) follows a single exponential relaxation time  $T_1^{\text{app}}$  (Eq (7)), while the magnetization recovery in Phase 1 ( $T_{\text{SR}} < t_{\text{tran}}$ ) in theory is influenced by both  $T_1^{\text{app}}$  and  $T_{1a}$  (see (Eq 5)).

Close examination of (Eq 5) for Phase 1, one can see that the signal recovery described by the term  $A$  only depends on  $T_1^{\text{app}}$  whereas the signal recovery of the term  $B$  relies on both  $T_1^{\text{app}}$  and  $T_{1a}$ . A simulation study was conducted using (Eq 5) and the parameters relevant to this study for comparing the relative contributions of  $A$  and  $B$  terms (see [S1 Supporting Information](#)) and it turns out that the term  $B$  in (Eq 5) is less than 4% of the term  $A$  within a reasonable artery transit time range (100–500ms) in the rat brain [1, 24–26]. Therefore, a single exponential recovery according to the term  $A$  is a rational approximation for the rat brain application during Phase 1 ( $T_{\text{SR}} < t_{\text{tran}}$ ) since the magnetization contribution from the term  $B$  is negligible. Therefore, the exponential recovery functions for both Phase 1 and Phase 2 can be unified as a single exponential recovery function according to  $T_1^{\text{app}}$ . In summary, a single exponential fitting of  $T_1^{\text{app}}$  based on multiple SR- $T_1$  MRI measurements with varied  $T_{\text{SR}}$  values

presents a simple approach and good approximation for imaging  $T_1^{app}$  or  $R_1^{app}$  which can be quantitatively linked to CBF according to (Eq 6).

### Imaging $T_1^{app}$ (or $R_1^{app}$ ), $T_1^{CBF}$ (or $R_1^{CBF}$ ) and CBF change ( $\Delta CBF$ )

The  $T_1$  and  $R_1$  term in (Eq 6) represent the intrinsic brain tissue property of longitudinal relaxation time and rate, respectively; they are usually insensitive to physiological changes and can be treated as constants. The  $R_1^{app}$  difference between the reference and perturbed conditions becomes:

$$\Delta R_1^{app} = \Delta R_1^{temp} + \frac{\Delta CBF}{\lambda} \tag{8}$$

where  $\Delta CBF = CBF_{PC} - CBF_{RC}$ . Thus, CBF change ( $\Delta CBF$ ) between perturbation and reference conditions can be calculated from the following equation:

$$\Delta CBF = \lambda \cdot (\Delta R_1^{app} - \Delta R_1^{temp}) = \lambda \cdot \Delta R_1^{CBF} \tag{9}$$

where  $\Delta R_1^{CBF}$  presents the  $R_1$  change, which is solely attributed to the CBF change induced by physiopathological perturbation; and it can be imaged by the SR- $T_1$  MRI method through three steps: i) image brain MRI SI as a function of  $T_{SR}$  during both control and perturbed conditions, and then determine the  $T_1^{app}$  values in each image pixel by the exponential regression of measured SI as a function of  $T_{SR}$  according to (Eq 1); ii) subtract the control  $R_1^{app}$  ( $= 1/T_1^{app}$ ) value from the perturbed  $R_1^{app}$  value resulting in  $\Delta R_1^{app}$ ; iii) determine  $\Delta T_1^{temp}$  or  $\Delta R_1^{temp}$  caused by a brain temperature change induced by perturbation (see S1 Supporting Information), then calculate  $\Delta R_1^{CBF}$  and  $\Delta CBF$  according to (Eq 9). The unit of CBF in (Eq 9) is ml/g/second, which can be converted to a conventional unit of ml/g/min by multiplying CBF by 60.

## Materials and MRI Measurements

### Animal preparation and Experiment Design

All animal experiments were conducted according to the National Research Council’s Guide for the Care and Use of Laboratory Animals and under the protocols approved by the Institutional Animal Care and Use Committee of University of Minnesota. Twelve male Sprague-Dawley rats weighing  $328 \pm 35$  g were included in this study. The rat was initially anesthetized and intubated using 5% (v/v) isoflurane in  $N_2O:O_2$  (60/40) gas mixture. Both femoral arteries and left femoral vein were catheterized for physiological monitoring and blood sampling. Five rats were used for simultaneous MRI/LDF/temperature measurements. The LDF/Temperature instrument (Oxford Optronix, UK) was used to concurrently measure the percentage change of CBF or the relative CBF change that is defined as  $rCBF = CBF_{PC}/CBF_{RC}$  and the brain temperature change in the cortical region in one hemisphere by inserting the LDF/Temperature probe (0.5 mm diameter) into the brain tissue through a small hole ( $3 \times 3$  mm<sup>2</sup>) passing both skull and dura (1.5–4 mm lateral, 1.5–3 mm posterior to the bregma, 1.9 mm deep). The soft tissue around the hole was kept to minimize magnetic susceptibility artifacts in MRI. After the surgical operation, the rat was placed in a home-built cradle incorporating ear bars and a bite bar to reduce head movement and to ensure proper positioning inside the MRI scanner. The animal anesthesia was maintained at 2% isoflurane. Rectal temperature was maintained at  $37.0 \pm 0.5^\circ C$  by a circulating/heating water blanket and the rate and volume of ventilation were adjusted to maintain normal blood gases.

Mild transient hypercapnia was induced in eight of the twelve rats used in this study by ventilating the gas mixture of 10%  $CO_2$ , 2% isoflurane and 88%  $N_2O:O_2$  (60/40) for 7 minutes; three of the eight rats were used for simultaneous measurements of  $\Delta R_1^{CBF}$ ,  $\Delta CBF$  and BOLD

using the SR- $T_1$  MRI method, and rCBF and temperature (T) change using the LDF/Temperature probe; and other five rats were used to conduct the MRI experiments only.

All twelve rats performed 1-minute occlusion of the two carotid arteries to achieve acute, global brain ischemia using the four-blood-vessel-occlusion rat model [27]. The transient hypercapnia experiment was performed first, followed by the acute ischemia experiment, and the rats were sacrificed by KCl injection for approaching cardiac arrest at the end of the experiment. There was an adequately long waiting time between these studies to ensure stable animal conditions prior to each perturbation and measurement. The SR- $T_1$  GE-EPI data were acquired for two minutes prior to each perturbation of transient hypercapnia (7 minutes), acute ischemia (1 minute) or KCl injection for approaching cardiac arrest. This control (or prior-perturbation) imaging acquisition period is defined as Stage 1. The duration during either the transient hypercapnia or acute ischemia perturbation is defined as the perturbation stage or Stage 2. Finally, the relatively long post-perturbation period was divided into three stages (i.e., early Stage 3; middle Stage 4 and late Stage 5).

## MRI measurement

All MRI experiments were conducted on a 9.4T horizontal animal magnet (MagneX Scientific, Abingdon, UK) interfaced to a Varian INOVA console (Varian, Palo Alto, CA, USA). A butterfly-shape  $^1\text{H}$  surface coil (2.8×2.0 cm with the short axis paralleled to the animal spine) was used to collect all MRI data. Scout images were acquired using a turbo fast low angle shot (TurboFLASH) imaging sequence [28] with the following acquisition parameters: TR = 10 ms, TE = 4 ms, image slice thickness = 2 mm, field of view (FOV) = 3.2 cm×3.2 cm; image matrix size = 128×128.

The magnetization saturation of water spin inside the rat brain was achieved by using the local  $B_1$  field of the RF surface coil and the adiabatic  $90^\circ$ RF pulse followed by three orthogonal dephasing gradients. GE-EPI (TE = 21 ms; FOV = 3.2cm×3.2cm; image matrix size = 64×64; single slice coronal image with 2 mm thickness) combined with the saturation-recovery preparation was used to image  $T_1^{\text{app}}$  with seven  $T_{\text{SR}}$  values of 0.004, 0.1, 0.2, 0.3, 0.4, 0.5 and 10 s, which resulted in a temporal resolution of 11.9 s for obtaining one set of  $T_1^{\text{app}}$  and BOLD images. This SR- $T_1$  GE-EPI imaging sequence (see Fig 1a) was applied to: i) measure  $\Delta R_1^{\text{CBF}}$  resulting from either hypercapnia (CBF increase) or acute ischemia (CBF reduction) compared to the control condition; ii) determine the relationship between brain temperature change and  $\Delta R_1^{\text{temp}}$  immediately after the cardiac arrest (i.e., CBF = 0) with a KCl bolus injection (see S1 Supporting Information for details); and iii) determine  $\Delta\text{CBF}$  values and then compare and correlate the values with the LDF measurement results.

## Data analysis

MRI data analysis was performed using the STIMULATE software package (Stimulate, Center for Magnetic Resonance Research, University of Minnesota, USA) [29] and the Matlab software package (The Mathworks Inc., Natick, MA, USA). LDF data was sub-sampled to match the corresponding MRI sampling rate and processed with home-written Matlab programs. Both region of interest (ROI) and single pixel MRI data taken from the rat sensory cortical region were used to perform the  $T_1^{\text{app}}$  regression analysis and to determine  $\Delta R_1^{\text{app}}$ ,  $\Delta R_1^{\text{temp}}$  (see S1 Supporting Information for details) and  $\Delta\text{CBF}$  according to Eqs (8) and (9). The least-square nonlinear curve-fitting program using the Matlab software was applied to perform the  $T_1^{\text{app}}$  regression analysis. The regression accuracy was estimated by the sum squared error (sse) and the square of regression coefficient ( $R^2$ ).

To improve the quantification accuracy, the GE-EPI data were averaged within each stage as defined above and then applied to calculate the averaged values of  $\Delta R_1^{\text{app}}$ ,  $\Delta R_1^{\text{temp}}$  and  $\Delta\text{CBF}$  based on the transient hypercapnia or acute ischemia measurement. The reference control CBF ( $\text{CBF}_{\text{RC}}$ ) was further estimated from the averaged  $\Delta\text{CBF}$  values and its corresponding relative CBF changes (rCBF) measured by LDF under ischemia condition and during the reperfusion period after the acute ischemia. ROIs (ranging from 24 to 52 pixels) were chosen from the cortical brain region in the intact hemisphere with the location being approximately contralateral to the LDF recording side for those experiments performing simultaneous MRI and LDF/Temperature measurements in order to avoid the MRI susceptibility artifacts caused by the LDF/Temperature probe. The GE-EPI data acquired with the longest  $T_{\text{SR}}$  of 10 s (i.e.,  $\approx 5T_1$ ) were used to calculate BOLD according to (Eq 3).

The  $R_1^{\text{app}}$  images at the control stage and a series of  $\Delta\text{CBF}$  and BOLD images measured during and post hypercapnia and/or ischemia stages were created on a pixel-by-pixel basis (pixel size  $0.25 \times 0.25 \times 2 \text{ mm}^3$ , with nearest neighbor interpolation) with two-dimensional median filtering and then overlapped on the anatomic image. Paired t-test was applied to compare the  $T_1^{\text{app}}$  values measured at reference and perturbation conditions obtained from either ROIs or single pixel, as well as to compare the regressed  $T_1^{\text{app}}$  values using ROI or single pixel data under a given condition. A p value of  $< 0.05$  is considered as statistically significant.

## Results

### Reliability and sensitivity of $T_1^{\text{app}}$ measurement using the SR- $T_1$ MRI method

The averaged  $T_1^{\text{app}}$  value measured using the SR- $T_1$  MRI method in the rat cortex region under the normal physiological condition was  $2.30 \pm 0.03 \text{ s}$  ( $n = 12$ ) at 9.4T. Fig 2 demonstrates a representative, single SR- $T_1$  GE-EPI measurement under control, hypercapnia and ischemia condition, respectively, and the  $T_1^{\text{app}}$  regression results based on ROI (Fig 2a) and single pixel (Fig 2b) data analysis without signal averaging. All the experimental data fitted well with an exponential function ( $R^2 \geq 0.99$  and  $\text{sse} < 2 \times 10^{-4}$ ). The  $T_1^{\text{app}}$  regression curves and the fitted  $T_1^{\text{app}}$  values measured under control, hypercapnia and ischemia conditions were distinguishable and highly reproducible; and the results between the ROI and single pixel data analysis were consistent (Fig 2). For instance, no statistical difference was found between the  $T_1^{\text{app}}$  values obtained from the ROI analysis versus single pixel analysis under either the hypercapnia ( $p = 0.93$ , 12 image volumes using paired t-test) or the ischemia ( $p = 0.83$ , 5 image volumes using paired t-test) condition. These results reveal a high reliability of the proposed MRI method for imaging  $T_1^{\text{app}}$  and its change down to the pixel level, and this reproducibility is crucial in generating reliable  $T_1^{\text{app}}$  maps. Moreover, the determined  $T_1^{\text{app}}$  values under the hypercapnia and ischemia perturbations were statistically different from the control  $T_1^{\text{app}}$  value ( $p < 0.01$ ), indicating that the  $T_1^{\text{app}}$  relaxation process is sensitive to the perfusion changes induced by physiology/pathology perturbations. It is worth to note that adding more  $T_{\text{SR}}$  points in a median  $T_{\text{SR}}$  range (e.g., few seconds) could be helpful to further improve the fitting accuracy of  $T_1^{\text{app}}$  (or  $R_1^{\text{app}}$ ) measurement with a tradeoff of reduced imaging temporal resolution; nevertheless, the benefit on the outcome of  $\Delta R_1^{\text{app}}$ , thus,  $\Delta\text{CBF}$  measurement is insignificant because of the cancelation of the systematic errors of  $R_1^{\text{app}}$  measurements under control and perturbation conditions (data not shown herein). One could optimize the  $T_{\text{SR}}$  values and the number of  $T_{\text{SR}}$  points for achieving a proper balance between the  $T_1^{\text{app}}$  fitting accuracy and imaging temporal resolution.



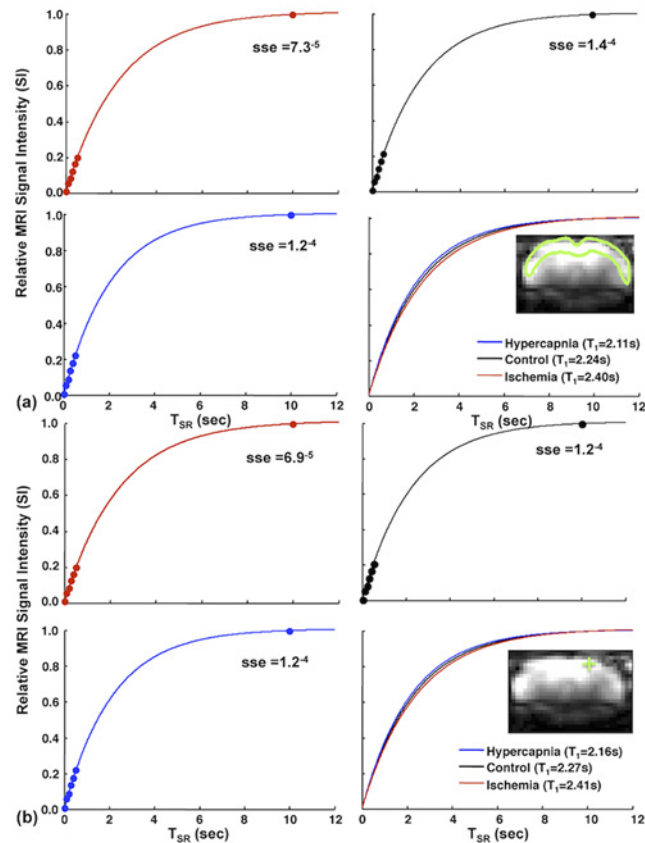

**Fig 2.  $T_1^{app}$  regression time courses with the SR- $T_1$  MRI method.** Time courses from a single SR- $T_1$  GE-EPI measurement and  $T_1^{app}$  regression under control (black lines); hypercapnia (blue lines); and ischemia (red lines) conditions based on (a) ROI and (b) single EPI pixel located inside the rat brain cortex. Colored dots are the signal data points imaged at different  $T_{SR}$ s under different conditions. Three  $T_1$  fitting lines and their  $T_1^{app}$  values under three conditions are also displayed in (a) and (b). The inserts show a coronal brain GE-EPI from a representative rat, indicating the location of (a) the ROI (enclosed in the green solid line) and (b) a single pixel (green cross mark) used for the regression (sse stands for the sum squared error;  $R^2 = 0.99$ ).

doi:10.1371/journal.pone.0122563.g002

## Relationships between rCBF, relative $R_1^{CBF}$ and BOLD induced by perturbations

Fig 3 shows the high temporal resolution ( $\sim 12$  s per data point) time courses of relative  $R_1^{CBF}$  ( $rR_1^{CBF}$ : the  $R_1^{CBF}$  ratio between RC and PC conditions) and rBOLD measured by the SR- $T_1$  MRI method from the ROI located in the rat sensory cortex and rCBF measured by LDF in the similar brain region before, during and after (a) transient hypercapnia and (b) acute ischemia perturbation from a representative rat. Despite some fluctuations, these time courses display expected temporal behaviors and dynamics. First, there are approximately parallel trends among all of the measured time courses. Secondly, the transient hypercapnia led to significant increases in the measured parameters owing to the vascular dilation effect, thus, increasing perfusion followed by a recovery back to the baseline level after the termination of hypercapnia. Thirdly, the acute ischemia caused rapid reductions in all measured parameters followed by a substantial overshooting (reperfusion) after the termination of ischemia and a slow recovery to the baseline level. Nevertheless, a careful examination of Fig 3 suggests a stronger temporal correlation between the measured  $rR_1^{CBF}$  and rCBF (correlation coefficient = 0.84 for hypercapnia and 0.90 for

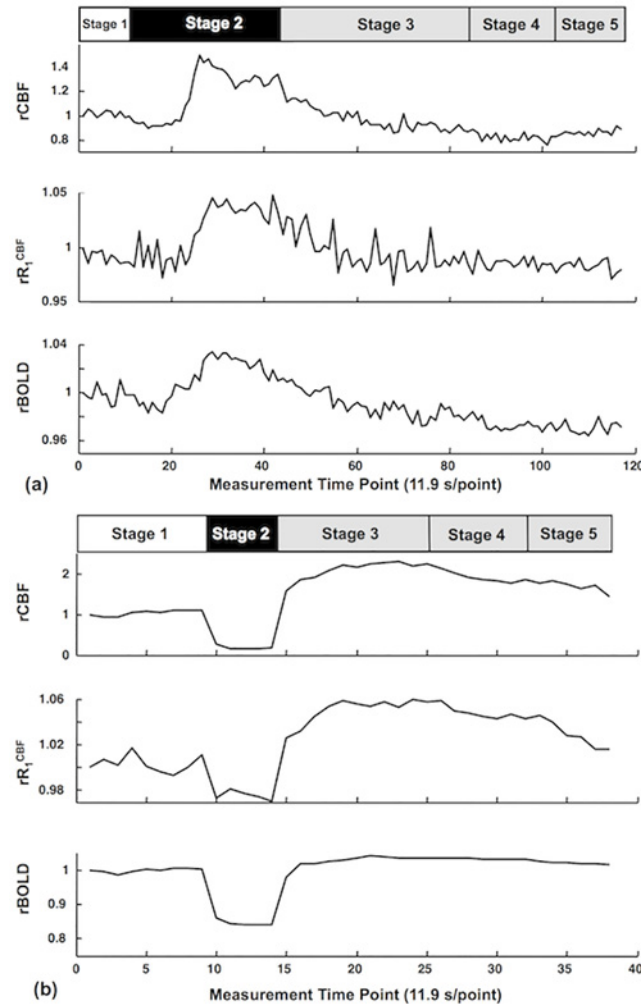

**Fig 3. Time courses of relative  $rR_1^{CBF}$ , rBOLD and rCBF of hypercapnia and global ischemia experiments.** Time courses of relative  $R_1^{CBF}$  ( $rR_1^{CBF}$ ) and relative BOLD (rBOLD) measured by the SR- $T_1$  MRI method, relative CBF change (rCBF) measured by LDF before, during and after (a) hypercapnia and (b) ischemia perturbation from a representative rat (data extracted from a region of interest). The bar graphs on top indicate the experimental acquisition protocol of (a) hypercapnia and (b) ischemia. Five stages are defined for imaging acquisition under varied animal conditions. Stage 1 represents the control (or prior-perturbation) period (2 minutes) prior to the induction of perturbations (i.e., hypercapnia or ischemia). Stage 2 represents the perturbation period either for the transient hypercapnia (7 minutes) or acute ischemia (1 minute). Stages 3, 4 and 5 represent the three post-perturbation periods with varied time duration after either the transient hypercapnia or acute ischemia perturbation. Because the post-perturbation effects on CBF and BOLD responses were much shorter for the 1-minute acute ischemia perturbation than that of 7-minute transient hypercapnia perturbation, the durations for these three stages were different for these two perturbation studies: i) for the hypercapnia perturbation: 8 minutes for Stage 3; 3.4 minutes for Stage 4 and 3.2 minutes for Stage 5; and ii) for the ischemia: 2.4 minutes for Stage 3; 1.4 minutes for Stage 4 and 1.2 minutes for Stage 5. Please note that there were noticeable dynamic response delays (about 2 minutes) of CBF and BOLD response owing to a large dead volume in the ventilation system when slowly increasing the inhaled  $CO_2$  concentration during the hypercapnia experiment.

doi:10.1371/journal.pone.0122563.g003

ischemia,  $p < 0.01$ ) compared to the correlation of  $rR_1^{CBF}$  versus rBOLD (correlation coefficient = 0.78 for hypercapnia and 0.75 for ischemia,  $p < 0.01$ ). Relative BOLD (rBOLD) shows a more significant undershoot after the hypercapnia (Fig 3a) and a smaller overshooting after the ischemia than that of  $rR_1^{CBF}$  and rCBF (Fig 3b). These results reveal the feasibility of the SR- $T_1$

MRI method to simultaneously measure BOLD and  $rR_1^{CBF}$  which is tightly correlated to the CBF change; and its ability to temporally dissociate the BOLD and CBF responses with relatively high temporal resolution. It is also interesting to note that the  $rR_1^{CBF}$  time course had a relatively large fluctuation compared to the BOLD time course, presumably owing to a moderately low inherent contrast-to-noise ratio to measure the CBF change.

During the ischemia perturbation,  $R_1^{CBF}$  decreased  $4.7 \pm 1.2\%$  ( $n = 5$ ) compared to the control condition, which was equivalent to a  $5.1 \pm 1.4\%$  increase of  $\Delta T_1^{CBF}$ ; accordingly, CBF decreased  $89.5 \pm 1.8\%$  and BOLD decreased  $23.1 \pm 2.8\%$ . During the hypercapnia, in contrast,  $R_1^{CBF}$  increased  $5.1 \pm 0.8\%$  ( $n = 3$ );  $\Delta T_1^{CBF}$  decreased  $4.8 \pm 0.7\%$ ; CBF increased  $82 \pm 12\%$ ; and BOLD increased  $4.5 \pm 2.7\%$ .

Fig 4 shows the plots of  $\Delta R_1^{CBF}$  versus (rCBF-1) (Fig 4a) and versus (rBOLD-1) (Fig 4b) measured for the ischemia study. It indicates an excellent consistency and strong linear

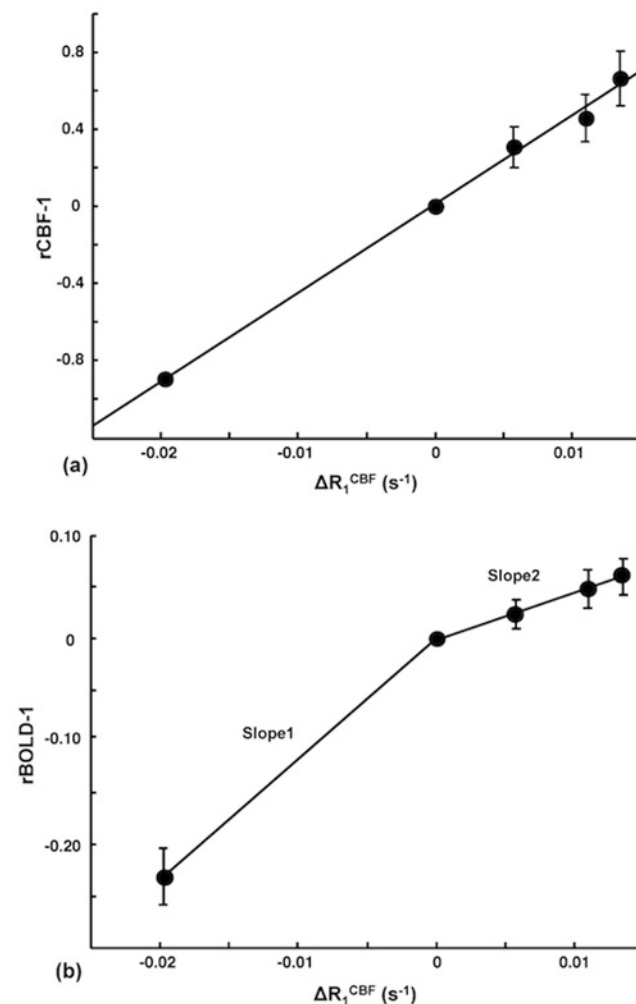

**Fig 4. Correlation between  $\Delta R_1^{CBF}$  versus (a) rCBF-1 and (b) rBOLD-1.** Correlation between the averaged  $\Delta R_1^{CBF}$  measured by the SR- $T_1$  MRI method versus (a) rCBF-1 and (b) rBOLD-1 obtained during the five stages of ischemia experiment. The vertical bars indicate the standard error (SEM) ( $n = 5$ ). There is a strong, positive correlation between (rCBF-1) and  $\Delta R_1^{CBF}$  in (a). In contrast, there are two distinct linear fitting slopes between (rBOLD-1) and  $\Delta R_1^{CBF}$  in (b) owing to the decoupled change between them during the post-ischemia stages.

doi:10.1371/journal.pone.0122563.g004

**Table 1. Summary of  $\Delta R_1^{CBF}$ ,  $\Delta CBF$ , (rCBF-1) and the estimated reference control CBF.**

| Rat No.     | Ischemia Stage (Stage 2)   |                                    |        |                        | Ischemia Overshooting Stage (Stage 3) |                                    |        |                        |
|-------------|----------------------------|------------------------------------|--------|------------------------|---------------------------------------|------------------------------------|--------|------------------------|
|             | $\Delta R_1^{CBF}(s^{-1})$ | Calculated $\Delta CBF$ (ml/g/min) | rCBF-1 | Control CBF (ml/g/min) | $\Delta R_1^{CBF}(s^{-1})$            | Calculated $\Delta CBF$ (ml/g/min) | rCBF-1 | Control CBF (ml/g/min) |
| 1           | -0.023                     | -1.247                             | -0.883 | 1.413                  | 0.014                                 | 0.751                              | 0.332  | 2.263                  |
| 2           | -0.036                     | -1.928                             | -0.899 | 2.145                  | 0.024                                 | 1.280                              | 1.104  | 1.159                  |
| 3           | -0.014                     | -0.778                             | -0.924 | 0.841                  | 0.016                                 | 0.880                              | 0.597  | 1.474                  |
| 4           | -0.012                     | -0.664                             | -0.833 | 0.798                  | 0.006                                 | 0.346                              | 0.834  | 0.415                  |
| 5           | -0.013                     | -0.713                             | -0.938 | 0.760                  | 0.007                                 | 0.389                              | 0.445  | 0.874                  |
| <b>Mean</b> | -0.020                     | -1.066±0.239                       | -0.895 | 1.191±0.267            | 0.013                                 | 0.729±0.172                        | 0.662  | 1.237±0.310            |
| <b>±SEM</b> | ±0.005                     |                                    | ±0.018 |                        | ±0.003                                |                                    | ±0.139 |                        |

Summary of  $\Delta R_1^{CBF}$ , calculated CBF change ( $\Delta CBF$ ) based on  $\Delta R_1^{CBF}$ , (rCBF-1) measured with LDF during the ischemia (Stage 2) and the first post-ischemia stage (Stage 3); and the estimated reference control CBF of five individual rats and its mean and standard error values.

doi:10.1371/journal.pone.0122563.t001

correlation between the CBF change and  $\Delta R_1^{CBF}$  across all five stages studied; and the correlation can be described by the following numerical equation that was obtained by the linear regression:

$$(rCBF - 1) = 45.9 \cdot \Delta R_1^{CBF} + 0.01 \tag{10}$$

with  $R^2 = 0.99$ . In contrast, two distinct linear fitting slopes (slope ratio = 2.6) were observed between  $\Delta R_1^{CBF}$  and (rBOLD-1), indicating the independence of the SR-T<sub>1</sub> MRI method for simultaneously determining  $\Delta R_1^{CBF}$  and BOLD; and showing the decoupled changes of these two physiological parameters during the post-ischemia stages.

Table 1 summarizes the results of simultaneous rCBF (by LDF) and  $\Delta R_1^{CBF}$  measurements (by the SR-T<sub>1</sub> MRI method) during the ischemia (Stage 2) and the first post-ischemia period (Stage 3) for each rat and averages among inter-subjects. The  $\Delta R_1^{CBF}$  value was used to calculate the CBF change ( $\Delta CBF$ ) according to (Eq 9), and then rCBF and  $\Delta CBF$  were applied to estimate the reference control (or baseline condition) CBF (i.e.,  $CBF_{RC}$ ) according to the following relationship:

$$CBF_{RC} = \Delta CBF / (rCBF - 1) \tag{11}$$

The estimated  $CBF_{RC}$  was 1.19±0.27 ml/g/min calculated from the ischemia stage (Stage 2) data, and 1.24±0.31 ml/g/min calculated from the first post-ischemia stage (Stage 3) data, showing an excellent consistency between them. The estimated baseline CBF values in this study are coincident with the reported values in the literature ranging from 0.9 to 1.5 ml/g/min (1.29±0.05 ml/g/min) measured in the rat cortex under similar isoflurane anesthesia condition, which are summarized in S1 Supporting Information. Furthermore, if we approximate the small interception value of 0.01 to zero in (Eq 10) and replace (rCBF-1) term in (Eq 11) with the approximated (Eq 10), we derived  $CBF_{RC} = (60\text{sec}/\text{min}) \cdot \lambda(\text{ml}/\text{g}) / 45.9(\text{sec}) = 1.18 \text{ ml}/\text{g}/\text{min}$  using the relationship of (Eq 9). This value based on the regressed slope of 45.9 sec in (Eq 10) using the data shown in Fig 4a is again in good agreement with the averaged literature value of 1.29±0.05 ml/g/min. These comparison results provide ample evidence supporting the feasibility and reliability of the proposed SR-T<sub>1</sub> MRI method in measuring and quantifying the CBF changes induced by physiological/pathological perturbations.

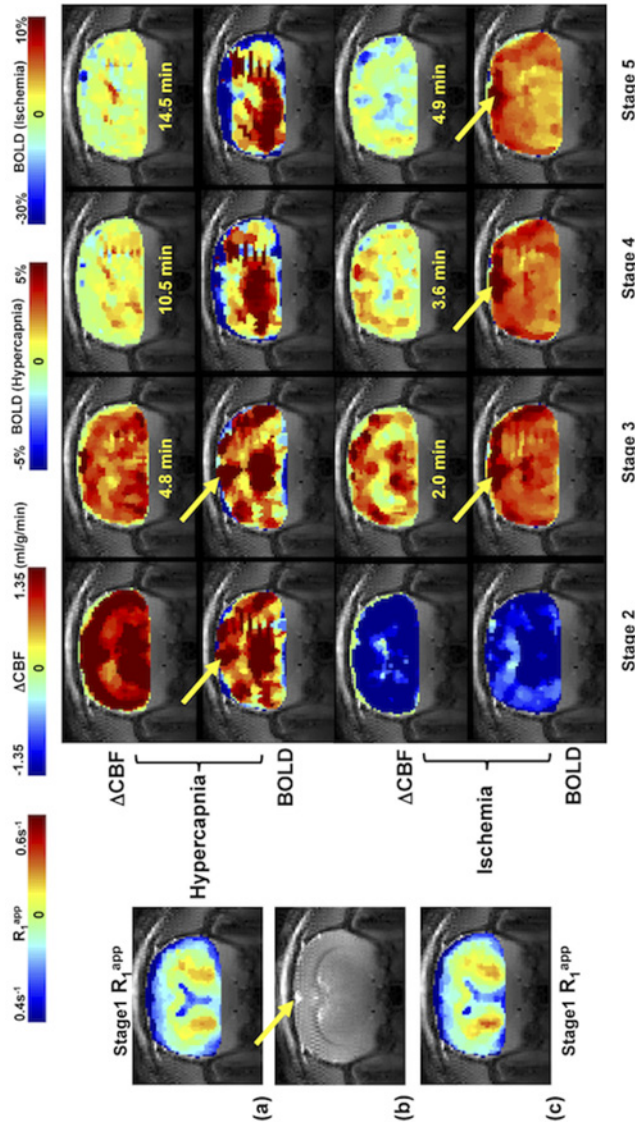

**Fig 5. Coronal anatomic image,  $R_1^{app}$  images,  $\Delta$ CBF and BOLD images of a representative rat.** (a) and (c) Reference control  $R_1^{app}$  images (acquired during Stage 1); the SR- $T_1$  MRI method generated  $\Delta$ CBF and BOLD images of Stage 2 to Stage 5 obtained from (a) hypercapnia and (c) ischemia study, respectively from a representative rat brain. (b) Anatomic coronal image from the same rat. The time indicated between the  $\Delta$ CBF and BOLD images is the approximate image sampling time after the termination of Stage 2. The yellow arrows point to the sinus vessel. The total image averaging time for Stages 2 to 5 were: 2.5, 6.5, 4.6 and 3.2 minutes for the hypercapnia study; and 1.0, 1.8, 1.4 and 1.2 minutes for the ischemia study.

doi:10.1371/journal.pone.0122563.g005

Fig 5 shows the control  $R_1^{app}$  images (coronal orientation) of rat brain, anatomic image, and the  $\Delta$ CBF and BOLD images measured by the SR- $T_1$  MRI method during and after the hypercapnia/ischemia perturbation in a representative rat without the use of LDF probe to avoid the susceptibility MRI artifacts. It illustrates that the SR- $T_1$  MRI method is robust and sensitive for noninvasively imaging the CBF changes in response to a physiological (hypercapnia) or pathological (ischemia) challenge with a few minutes of image acquisition time. Moreover, the BOLD images can also be simultaneously obtained.

## Discussion

### Underlying mechanism for imaging CBF change in rat brain using the SR- $T_1$ imaging method

Instead of focusing on the magnetization change by delivering tagged spins to the image slice (s) at a certain  $T_{IR}$  in the ASL approach,  $T_1$  perfusion model [2, 5, 6, 10] views CBF circulation as an enhanced longitudinal relaxation through  $T_1^{app}$  as defined in (Eq 6). The rapid exchange between the saturated water protons in the image slice and the fully relaxed arterial blood water outside of the saturation region during the SR- $T_1$  MRI measurement enables a quantitative link between  $T_1^{app}$  and CBF. Based on the current MRI acquisition scheme used in this study, (Eq 5) (valid for Phase 1, when  $T_{SR} < t_{tran}$ ) and (Eq 7) (valid for Phase 2 when  $T_{SR} \geq t_{tran}$ ) quantitatively describe the magnetization change as a function of  $T_{SR}$  for the SR- $T_1$  MRI method with a two-phase perfusion model shown in Fig 1d. According to (Eq 5), the brain tissue relaxation depends on both  $T_1^{app}$  and  $T_{1a}$  when  $T_{SR} < t_{tran}$  (Phase 1), however, the term B in (Eq 5) which contains  $T_{1a}$  accounts for only few percentages of the term A and its contribution to the magnetization relaxation becomes insignificant. Therefore, a single exponential recovery function according to the  $T_1^{app}$  relaxation time provides a good approximation. When  $T_{SR} \geq t_{tran}$  (Phase 2), the brain tissue magnetization relaxation solely follows  $T_1^{app}$  according to (Eq 7). Therefore,  $T_1^{app}$  dominates the magnetization change through the entire  $T_{SR}$  covering both Phase 1 and Phase 2, and can be robustly regressed for determining CBF changes. The excellent  $T_1^{app}$  fitting curve (and excellent linearity in semi-log fitting, data not shown herein), as well as the high reproducibility and sensitivity to CBF alteration as shown in Fig 2 demonstrate that the single exponential function regression worked well in this study.

LDF measures a frequency shift in light reflected from moving red blood cells [30, 31]. It enables a real-time, continuous recording of relative (or percentage) CBF change in a focal region inside the brain; and is regarded as a standard tool for dynamic CBF measurements [32]. Moreover, LDF-based CBF measurements have been reported to be in good agreement with the radioactive microsphere CBF techniques [31, 33] as well as the hydrogen clearance CBF methods [34]. The excellent correlation between  $\Delta R_1^{CBF}$  measured with the SR- $T_1$  method and relative CBF change recorded by LDF technique (Figs 3 and 4) during physiological/pathological perturbations, and the coincidence between the calculated baseline CBF results and the reported CBF values in the literature clearly suggest that  $\Delta R_1^{CBF}$  imaged by the SR- $T_1$  MRI method quantitatively reflects the CBF changes. Besides the contributions from intrinsic  $T_1$  and CBF,  $T_1^{app}$  can be also slightly influenced by other factors, for example, temperature. Although the temperature correction of  $T_1^{app}$  could improve the accuracy of measurement,  $T_1^{app}$  without the correction still provide a good approximation to calculate CBF change since the temperature induced  $T_1$  change is small (see S1 Supporting Information).

### Advantages, limitations and methodology aspects of the SR- $T_1$ method for imaging CBF change and BOLD

The SR- $T_1$  MRI method has several unique merits when comparing it with the conventional ASL techniques using an inversion-recovery preparation. First, the modeling used to quantitatively link  $T_1^{app}$  and CBF in the SR- $T_1$  MRI method is simple and it requires much less physiological parameters aiming to quantify absolute  $\Delta CBF$  according to (Eq 9). Second, the SR- $T_1$  MRI method relies on parametric  $T_1^{app}$  mapping; thus, it does not require the paired control image as applied in most ASL methods for determining CBF change. Third, the saturation-recovery preparation avoids the requirement of relatively long TR constrained by the conventional  $T_1$  imaging methods based on the inversion-recovery preparation; this enables relatively

rapid mapping of  $T_1^{app}$  and  $\Delta R_1^{app}$  to generate the  $\Delta CBF$  image as illustrated in Fig 5. Although the imaging of  $T_1^{app}$  requires multiple measurements with varied  $T_{SR}$  values, its temporal resolution of 12 s per complete image set is comparable with other ASL methods (approximately 5–10 s). Fourth, the partial volume effect of cerebrospinal fluid (CSF) to  $\Delta CBF$  is minimal because of the subtraction out the undisturbed CSF-related  $R_1$  contribution under various animal conditions, slow movement of CSF water spins (about 20 times slower than CBF, [35–37]) and the negligible exchange between CSF and brain tissue water spins.

This study was based on single slice measurement to prove the concept and feasibility of the proposed SR- $T_1$  MRI method, nevertheless, it should be readily extended to multiple image slices covering a larger brain volume.

One technical limitation of the current SR- $T_1$  MRI method is its inability to directly measure the baseline CBF value under a physiological condition of interest, thus, the control value of  $CBF_{RC}$  was indirectly estimated by two independent measurements of  $\Delta CBF$  and  $rCBF$  using the SR- $T_1$  MRI method and LDF, respectively, in this study. This technique is more useable for imaging CBF changes, thus, requiring two measurement conditions, for instance, reference control versus perturbation (similar to the BOLD measurement) as presented in this study.

A surface RF coil generates an inhomogeneous distribution of  $B_1$  in space, resulting in a non-uniform RF pulse flip angle for saturating the water magnetization if a linear RF pulse waveform is used. In this study, we applied an adiabatic half passage  $90^\circ$  RF pulse to achieve relatively uniform  $90^\circ$  rotation of  $M_z$  into the transverse plane and to improve saturation efficiency, in particular, in the brain cortical region where  $B_1$  is strong. The ROI for data processing was chosen from this region (see Fig 2 for an example). In the deep brain region, distant from the surface coil, it might not be warranted to approach an adiabatic  $90^\circ$  rotation if the RF power is inadequate in this brain region. As a result, the RF saturation efficiency ( $0 \leq \alpha \leq 1$ ) can drop in the deep brain region and lead to relatively low saturation efficiency. However, this imperfection, if it exists, should not cause a significant error in determining  $T_1^{app}$  owing to the following two reasons.

First, the term of  $\alpha$  was considered in the least square regression to calculate the  $T_1^{app}$  value using the following formula

$$SI = SI_0 e^{-\frac{TE}{T_2^*}} (1 - \alpha \cdot e^{-\frac{T_{SR}}{T_1^{app}}}) \tag{12}$$

$$= k(1 - \alpha \cdot e^{-\frac{T_{SR}}{T_1^{app}}})$$

in which three constants,  $k$ ,  $\alpha$  and  $T_1^{app}$  are determined by regression. Though  $\alpha$  can become less than 1 in the deep brain region if  $B_1$  strength is inadequately strong, it can be treated as a constant. The  $T_1^{app}$  regression becomes insensitive to the absolute value of  $\alpha$ ; and the regression outcome is mainly determined by the exponential rate of SI recovery as a function of  $T_{SR}$ .

Second, a nominal  $90^\circ$  excitation pulse and a very short TE were used in the GE-EPI sampling in this study. In addition, there was no extra delay between the EPI signal acquisition and the next RF saturation pulse. This configuration further reduces the residual  $M_z$  component (or suppresses the  $M_z$  recovery) before the next magnetization saturation preparation. It acts as extra magnetization saturation, resulting in an improved saturation efficiency and insensitivity of regression to the value of  $\alpha$ . These notions are supported by the  $\Delta CBF$  images (Fig 5a and 5c) showing relatively uniform CBF changes across the entire image slice including the deep brain region. In contrast, the BOLD images show the ‘hot’ spots around the sinus vein as pointed by the arrows in Fig 5 because of the large BOLD effect near a large sinus vein [19]. Such ‘hot’ spots were not observed in the  $\Delta CBF$  images, indicating again that the  $\Delta CBF$  image is

more specific to the tissue perfusion and less susceptible to macro vessels. This differentiation between the simultaneously measured BOLD and  $\Delta$ CBF images suggests that the SR- $T_1$  MRI method indeed is able to independently but simultaneously measure two important physiological parameters: CBF change and BOLD. Although, there is a similar trend between the measured changes of  $\Delta$ CBF and BOLD during ischemia or hypercapnia perturbation as shown in this study, there are clearly distinct characters in both spatial distribution and temporal behavior between the  $\Delta$ CBF and BOLD images during the recovery periods after the perturbations, which provide complementary information of the brain hemodynamic changes in response to physiological/pathological perturbations.

The SR- $T_1$  MRI method is based on the exponential fitting of  $R_1^{\text{app}}$  using multiple EPI images with varied saturation-recovery times, and the  $R_1^{\text{app}}$  changes caused by either hypercapnia or ischemia were small (<5%). Therefore, the accuracy of fitting is susceptible to the EPI image noise level, in particular, in the brain regions with EPI susceptibility artifacts or weak  $B_1$  of the surface coil.

### Relationship between $\Delta R_1^{\text{CBF}}$ and the CBF change during ischemia and hypercapnia

It is known that the development of vasogenic edema usually occurs at a later phase, approximately 30 minutes after the induction of regional ischemia [38]; and the water accumulation in the ischemic tissue owing to cellular swelling takes place hours after the onset of ischemia [39, 40]. It is unlikely that vasogenic edema and water content change could be responsible for the measured  $\Delta R_1^{\text{CBF}}$  change in the present study since the global ischemia lasted only one minute and the SR- $T_1$  MRI measurements were continued within a relative short period during the post-perturbation stages. Therefore,  $\Delta R_1^{\text{CBF}}$  imaged by the SR- $T_1$  MRI method could be fully quantified to determine and image  $\Delta$ CBF. This notion is evident from the results of the ischemia study; and it also holds true for the hypercapnia study. However, it would be interesting to investigate the longitudinal  $T_1^{\text{app}}$  change in the severely or chronically ischemic brain region, which could be affected by the CBF change and possibly other physiopathological changes (infarction, edema, necrosis etc.) of brain tissue. Further study of their relative contributions to the  $T_1^{\text{app}}$  change would be helpful to understand the evolution of the ischemic lesion and its relationship with CBF change.

A similar estimation using the relationship of rCBF and  $\Delta$ CBF measured during the hypercapnia (Stage 2) resulted in the  $\text{CBF}_{\text{RC}}$  value of  $1.36 \pm 0.35$  ml/g/min ( $n = 3$ ). This value is close to that were calculated with the data collected during the ischemic/post-ischemic stages ( $\approx 1.2$  ml/g/min) although they are not exactly the same. This small discrepancy might be due to the slightly basal CBF drifting through the prolonged period of experiment because two experiments (hypercapnia and ischemia) were combined during the same MRI scanning session. It could also be related to the limited sampling size of hypercapnia experiments. Nevertheless,  $\Delta$ CBF increase induced by hypercapnia calculated from  $\Delta R_1^{\text{CBF}}$  correlates well with rCBF measured by LDF.

### Correlation of $R_1^{\text{CBF}}$ , CBF and BOLD during perturbations

Beside the aforementioned distinction of spatial responses between the  $\Delta$ CBF and BOLD images owing to the different specificity to the hemodynamic response with varied vessel size, it is interesting to note that there were significantly mismatched temporal responses between measured  $\Delta$ CBF and BOLD during both post-ischemia and post-hypercapnia stages. The “overshooting” effect was much less for BOLD than the  $\Delta$ CBF and rCBF responses during the post-ischemia stage (Fig 3b), leading to two distinct slopes of linear regression between (rBOLD-1)



and  $\Delta R_1^{\text{CBF}}$  (Fig 4b). There was also a substantial “undershooting” in the measured BOLD change during the later post-hypercapnia recovery stages (Fig 3a) compared to  $r\text{CBF}$  or  $rR_1^{\text{CBF}}$ . One explanation for this observation is that BOLD signal reflects a complex interplay among CBF, cerebral blood volume (CBV) and oxygen consumption rate ( $\text{CMRO}_2$ ) [19, 20]. Therefore, BOLD can become decoupled with the CBF change, and degree of the mismatched BOLD and  $\Delta\text{CBF}$  relies on the fractional changes in CBF, CBV and  $\text{CMRO}_2$  in response to a particular perturbation. The quantitative interpretation of the mismatched  $r\text{CBF}$ - $r\text{BOLD}$  behavior requires additional measurements of CBV and  $\text{CMRO}_2$ , which is beyond the scope of this article. Nevertheless, this mismatch could be linked to the uncoupling between the metabolic and hemodynamic responses associated with a physiology or pathology perturbation, and it should be useful for indirectly estimating the  $\text{CMRO}_2$  time course during the perturbation if the CBV change can be measured independently or estimated using a sophisticated BOLD modeling (e.g., [41]). In addition, the measured BOLD using the SR- $T_1$  MRI method under fully relaxed condition reflects the “true” BOLD without the CBF confounding effect; thus, further improve the outcome of quantification [23].

A local RF coil, such as a surface coil as used in the present study, has been commonly applied for most *in vivo* animal MRI/MRS brain studies. Its  $B_1$  field (or profile) induces regional longitudinal magnetization changes through saturation (or inversion) preparation prior to the EPI acquisition. The combination of regional  $M_z$  preparation and relatively short artery blood traveling time from the non-saturated region into the EPI slice in animal brains is the underlying mechanism for a quantitative link between  $\Delta\text{CBF}$  and  $\Delta R_1$  that can be robustly imaged by the SR- $T_1$  MRI method. Consequently, the  $T_1$  or  $T_1$ -weighted MRI signal changes commonly observed in the clinical imaging diagnosis, for instance, stroke patients, are at least partially attributed by the impaired perfusion, i.e.,  $\Delta\text{CBF}$ . Finally, the SR- $T_1$  MRI method can also be combined with a volume RF coil for imaging  $\Delta\text{CBF}$  with the implement of a slice-selective saturation preparation.

## Conclusion

In summary, we have described the SR- $T_1$  MRI method for noninvasively and simultaneously imaging the absolute CBF change and BOLD in response to physiological/pathological perturbations. This imaging method was rigorously validated in the rat brain with simultaneous LDF measurements under global ischemia and hypercapnia conditions. It should provide a robust, quantitative MRI-based neuroimaging tool for simultaneously measuring the CBF change and BOLD contrast associated with physiological perturbations (e.g., brain activation) or pathological perturbations (e.g., stroke or pharmaceutical drug treatment).

## Supporting Information

**S1 Supporting Information.** Detailed equation derivation for two-phase arterial spin model of the SR- $T_1$  method and simulation results. Supporting information regarding the confounding effect of brain temperature change on  $T_1^{\text{app}}$ .

(DOCX)

## Author Contributions

Conceived and designed the experiments: XW XHZ WC. Performed the experiments: XW XHZ YZ. Analyzed the data: XW XHZ WC. Wrote the paper: XW XHZ WC.

## References

1. Detre JA, Leigh JS, Williams DS, Koretsky AP. Perfusion imaging. *Magn Reson Med*. 1992; 23(1):37–45. PMID: [1734182](#).
2. Kwong KK, Belliveau JW, Chesler DA, Goldberg IE, Weisskoff RM, Poncelet BP, et al. Dynamic magnetic resonance imaging of human brain activity during primary sensory stimulation. *Proc Natl Acad Sci U S A*. 1992; 89(12):5675–9. PMID: [1608978](#).
3. Williams DS, Detre JA, Leigh JS, Koretsky AP. Magnetic resonance imaging of perfusion using spin inversion of arterial water. *Proc Natl Acad Sci U S A*. 1992; 89(1):212–6. PMID: [1729691](#).
4. Edelman RR, Siewert B, Darby DG, Thangaraj V, Nobre AC, Mesulam MM, et al. Qualitative mapping of cerebral blood flow and functional localization with echo-planar MR imaging and signal targeting with alternating radio frequency. *Radiology*. 1994; 192(2):513–20. PMID: [8029425](#).
5. Kim SG. Quantification of relative cerebral blood flow change by flow-sensitive alternating inversion recovery (FAIR) technique: application to functional mapping. *Magn Reson Med*. 1995; 34(3):293–301. PMID: [7500865](#).
6. Schwarzbauer C, Morrissey SP, Haase A. Quantitative magnetic resonance imaging of perfusion using magnetic labeling of water proton spins within the detection slice. *Magn Reson Med*. 1996; 35(4):540–6. PMID: [8992204](#).
7. Wong EC, Buxton RB, Frank LR. Implementation of quantitative perfusion imaging techniques for functional brain mapping using pulsed arterial spin labeling. *NMR Biomed*. 1997; 10(4–5):237–49. PMID: [9430354](#).
8. Buxton RB, Wong EC, Frank LR. Dynamics of blood flow and oxygenation changes during brain activation: the balloon model. *Magn Reson Med*. 1998; 39(6):855–64. PMID: [9621908](#).
9. Kim SG, Ugurbil K. Comparison of blood oxygenation and cerebral blood flow effects in fMRI: estimation of relative oxygen consumption change. *Magn Reson Med*. 1997; 38(1):59–65. PMID: [9211380](#).
10. Kwong KK, Chesler DA, Weisskoff RM, Donahue KM, Davis TL, Ostergaard L, et al. MR perfusion studies with T1-weighted echo planar imaging. *Magn Reson Med*. 1995; 34(6):878–87. PMID: [8598815](#).
11. Calamante F, Lythgoe MF, Pell GS, Thomas DL, King MD, Busza AL, et al. Early changes in water diffusion, perfusion, T<sub>1</sub>, and T<sub>2</sub> during focal cerebral ischemia in the rat studied at 8.5 T. *Magn Reson Med*. 1999; 41(3):479–85. PMID: [10204870](#).
12. Lythgoe MF, Thomas DL, Calamante F, Pell GS, King MD, Busza AL, et al. Acute changes in MRI diffusion, perfusion, T<sub>1</sub>, and T<sub>2</sub> in a rat model of oligemia produced by partial occlusion of the middle cerebral artery. *Magn Reson Med*. 2000; 44(5):706–12. PMID: [11064405](#).
13. van der Toorn A, Dijkhuizen RM, Tulleken CA, Nicolay K. T1 and T2 relaxation times of the major 1H-containing metabolites in rat brain after focal ischemia. *NMR Biomed*. 1995; 8(6):245–52. PMID: [8732180](#).
14. Shen Q, Du F, Huang S, Duong TQ. Spatiotemporal characteristics of postischemic hyperperfusion with respect to changes in T1, T2, diffusion, angiography, and blood-brain barrier permeability. *J Cereb Blood Flow Metab*. 2011; 31(10):2076–85. PMID: [21540871](#). doi: [10.1038/jcbfm.2011.64](#)
15. Quesson B, de Zwart JA, Moonen CT. Magnetic resonance temperature imaging for guidance of radiotherapy. *J Magn Reson Imaging*. 2000; 12(4):525–33. PMID: [11042633](#).
16. Parker DL, Smith V, Sheldon P, Crooks LE, Fussell L. Temperature distribution measurements in two-dimensional NMR imaging. *Med Phys*. 1983; 10(3):321–5. PMID: [6877179](#).
17. Dickinson RJ, Hall AS, Hind AJ, Young IR. Measurement of changes in tissue temperature using MR imaging. *J Comput Assist Tomogr*. 1986; 10(3):468–72. PMID: [3700752](#).
18. Botnar R. *Interventional Magnetic Resonance Imaging*, chapter 21 Temperature sensitive MR sequences. Berlin: Springer. : Springer Berlin Heidelberg; 1998.
19. Ogawa S, Lee TM, Nayak AS, Glynn P. Oxygenation-sensitive contrast in magnetic resonance image of rodent brain at high magnetic fields. *Magn Reson Med*. 1990; 14(1):68–78. PMID: [2161986](#).
20. Ogawa S, Lee T-M, Kay AR, Tank DW. Brain magnetic resonance imaging with contrast dependent on blood oxygenation. *Proc Natl Acad Sci USA*. 1990; 87:9868–72. PMID: [2124706](#)
21. Mansfield P. Multi-planar image formation using NMR spin echoes. *J Phys C*. 1977; 10:L55–L8.
22. Ackerman JJ, Grove TH, Wong GG, Gadian DG, Radda GK. Mapping of metabolites in whole animals by 31P NMR using surface coils. *Nature*. 1980; 283(5743):167–70. Epub 1980/01/10. PMID: [7350541](#).
23. Wang X, Zhu XH, Zhang Y, Chen W. Large enhancement of perfusion contribution on fMRI signal. *J Cereb Blood Flow Metab*. 2012; 32(5):907–18. PMID: [22395206](#). doi: [10.1038/jcbfm.2012.26](#)

24. Tsekos NV, Zhang F, Merkle H, Nagayama M, Iadecola C, Kim SG. Quantitative measurements of cerebral blood flow in rats using the FAIR technique: correlation with previous iodoantipyrine autoradiographic studies. *Magn Reson Med*. 1998; 39(4):564–73. PMID: [9543418](#).
25. Barbier EL, Silva AC, Kim SG, Koretsky AP. Perfusion imaging using dynamic arterial spin labeling (DASL). *Magn Reson Med*. 2001; 45(6):1021–9. PMID: [11378880](#).
26. Zhang W, Williams DS, Detre JA, Koretsky AP. Measurement of brain perfusion by volume-localized NMR spectroscopy using inversion of arterial water spins: accounting for transit time and cross-relaxation. *Magn Reson Med*. 1992; 25(2):362–71. PMID: [1614321](#).
27. Pulsinelli WA, Brierley JB. A new model of bilateral hemispheric ischemia in the unanesthetized rat. *Stroke*. 1979; 10(3):267–72. PMID: [37614](#).
28. Haase A, Frahm J, Matthaei D, Hanicke W, Merboldt KD. FLASH imaging. Rapid NMR imaging using low flip angle pulses. *J Magn Reson*. 1986; 67:258–66.
29. Strupp JP. Stimulate: A GUI based fMRI analysis software package. *Neuroimage* 3:S607. 1996.
30. Stern MD. In vivo evaluation of microcirculation by coherent light scattering. *Nature*. 1975; 254(5495):56–8. PMID: [1113878](#).
31. Dirnagl U, Kaplan B, Jacewicz M, Pulsinelli W. Continuous measurement of cerebral cortical blood flow by laser-Doppler flowmetry in a rat stroke model. *J Cereb Blood Flow Metab*. 1989; 9(5):589–96. PMID: [2674168](#).
32. Wadhvani KC R. Blood flow in the central and peripheral nervous system. In laser-Doppler blood flowmetry (öberg PA, ed): Boston, MA: Kluwer Academic,; 1988. pp 265–88 p.
33. Fabricius M, Lauritzen M. Laser-Doppler evaluation of rat brain microcirculation: comparison with the [<sup>14</sup>C]-iodoantipyrine method suggests discordance during cerebral blood flow increases. *J Cereb Blood Flow Metab*. 1996; 16(1):156–61. PMID: [8530548](#).
34. Kramer MS, Vinall PE, Katolik LI, Simeone FA. Comparison of cerebral blood flow measured by laser-Doppler flowmetry and hydrogen clearance in cats after cerebral insult and hypervolemic hemodilution. *Neurosurgery*. 1996; 38(2):355–61. PMID: [8869064](#).
35. Hazel RD, McCormack EJ, Miller J, Li J, Yu M, Benveniste H, et al., editors. Measurement of Cerebrospinal Fluid Flow in the Aqueduct of a Rat Model of Hydrocephalus ISMRM Proceedings; 2006; Seattle, Washington, USA.
36. Kreis D, Schulz D, Stein M, Preuss M, Nestler U. Assessment of parameters influencing the blood flow velocities in cerebral arteries of the rat using ultrasonographic examination. *Neurol Res*. 2011; 33(4):389–95. doi: [10.1179/1743132810Y.0000000010](#) PMID: [21535938](#).
37. Linninger AA, Xenos M, Zhu DC, Somayaji MR, Kondapalli S, Penn RD. Cerebrospinal fluid flow in the normal and hydrocephalic human brain. *IEEE transactions on bio-medical engineering*. 2007; 54(2):291–302. doi: [10.1109/TBME.2006.886853](#) PMID: [17278586](#).
38. Bell BA, Symon L, Branston NM. CBF and time thresholds for the formation of ischemic cerebral edema, and effect of reperfusion in baboons. *J Neurosurg*. 1985; 62(1):31–41. PMID: [3964854](#).
39. Iwama T, Yamada H, Andoh T, Sakai N, Era S, Sogami M, et al. Proton NMR studies on ischemic rat brain tissue. *Magn Reson Med*. 1992; 25(1):78–84. PMID: [1593959](#).
40. Young W, Rappaport ZH, Chalif DJ, Flamm ES. Regional brain sodium, potassium, and water changes in the rat middle cerebral artery occlusion model of ischemia. *Stroke*. 1987; 18(4):751–9. PMID: [3603602](#).
41. Davis TL, Kwong KK, Weisskoff RM, Rosen BR. Calibrated functional MRI: mapping the dynamics of oxidative metabolism. *Proc Natl Acad Sci U S A*. 1998; 95(4):1834–9. PMID: [9465103](#).
